# Supplementary material
Source: publisher site journal article supplement (https://www.dovepress.com/article/281529)
Supplement: Supplementary file 1 [file get_supplementary_file.php]

## **Supplementary Figure and Table legends**

**Supplementary Figure 1.** Overall study scheme of two-stage genome-wide association study for female obesity

**Supplementary Figure 2.** Regional plots of associated loci for BMI (A), WHR (B), and WC (C) in females

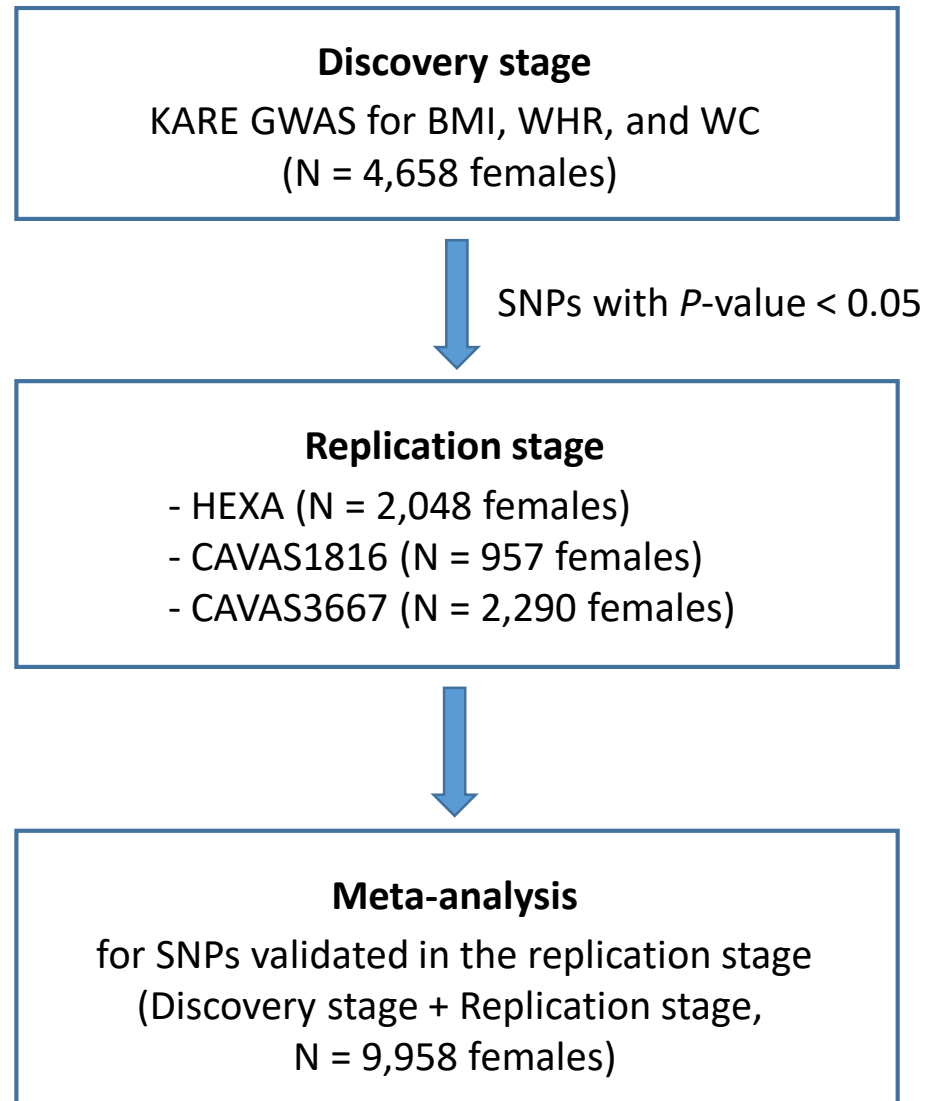

**Supplementary Fig. 1**

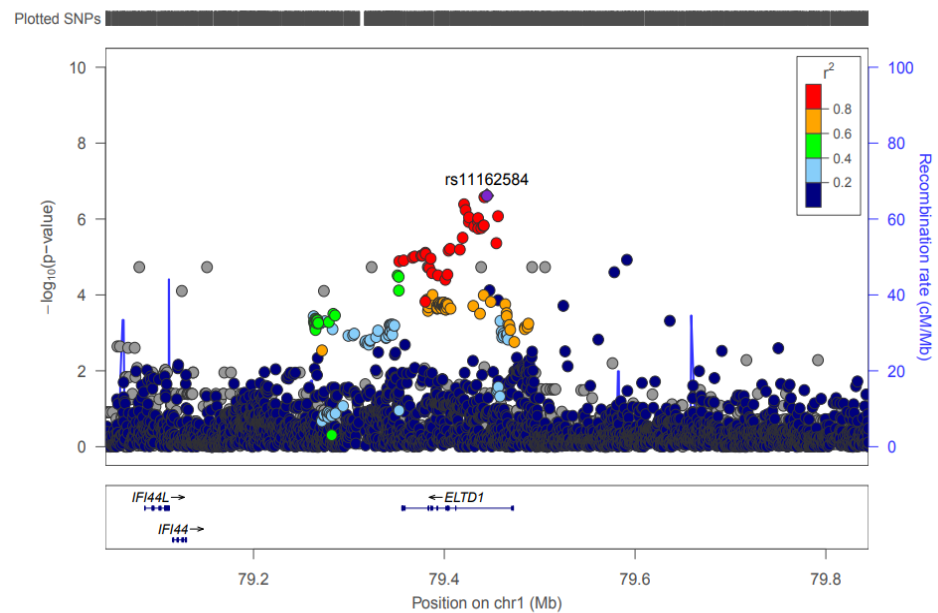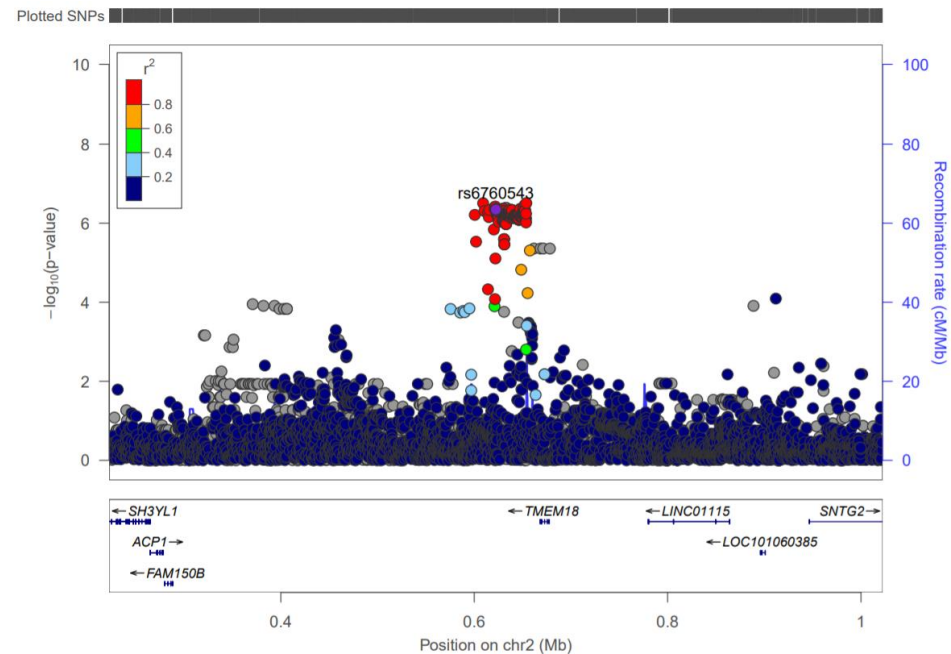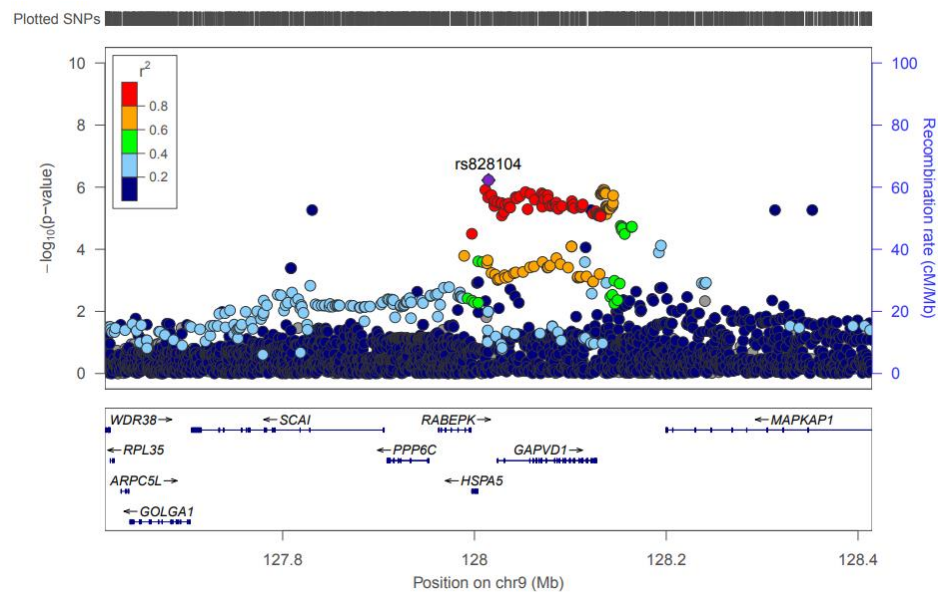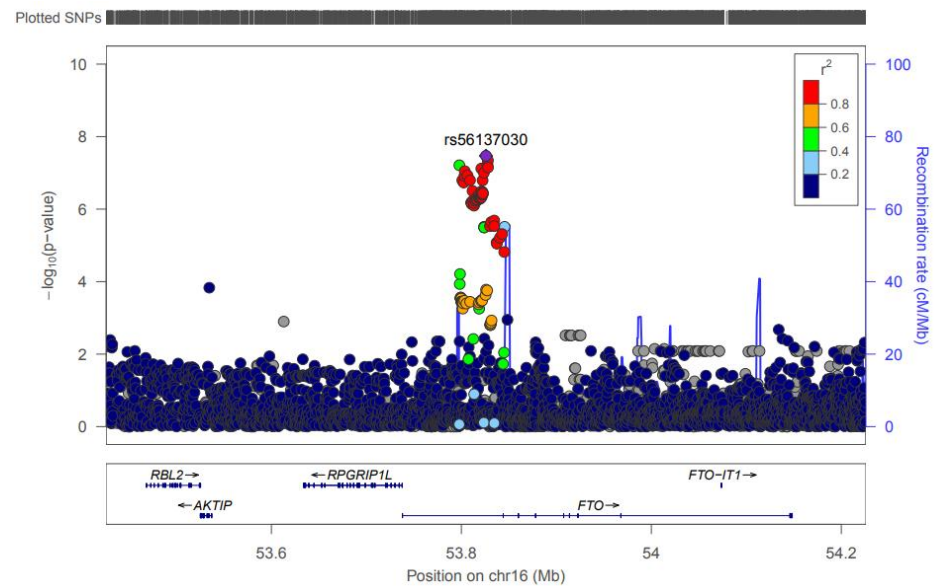

Supplementary Fig. 2(A)

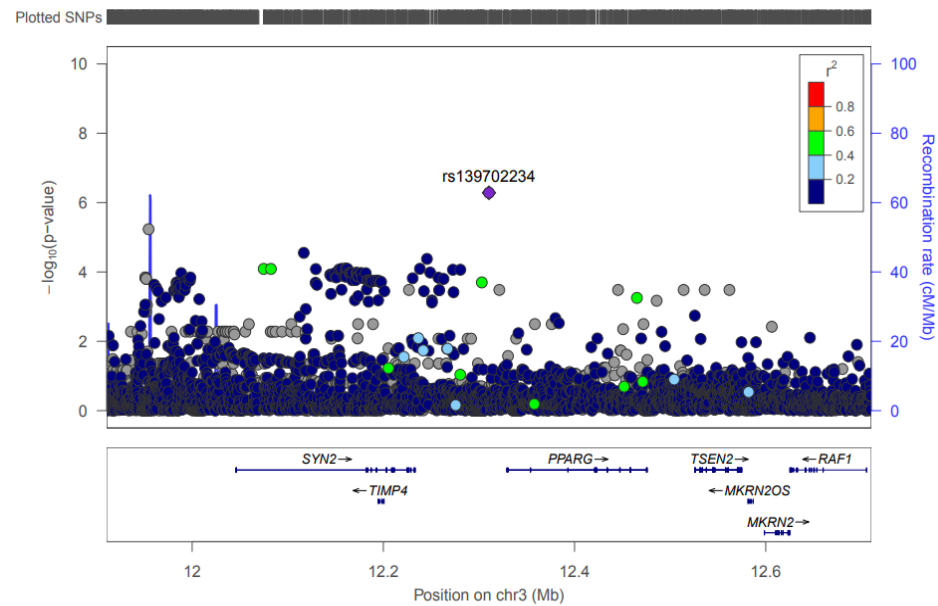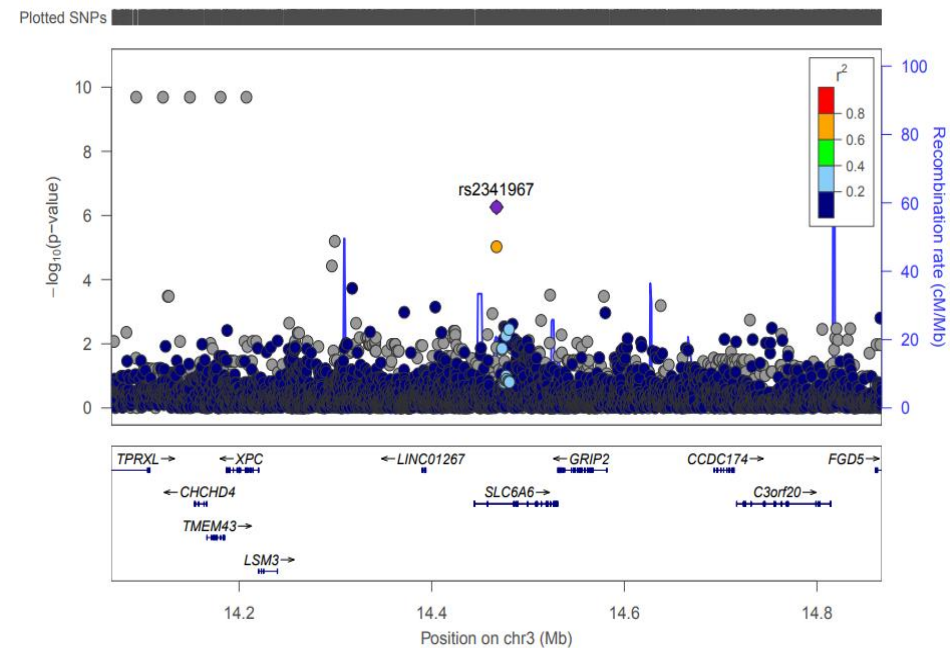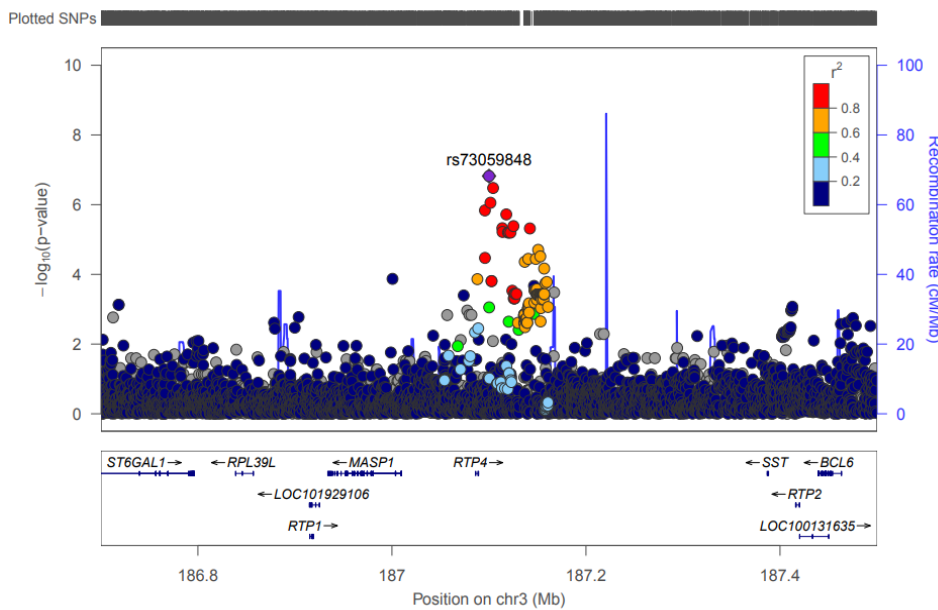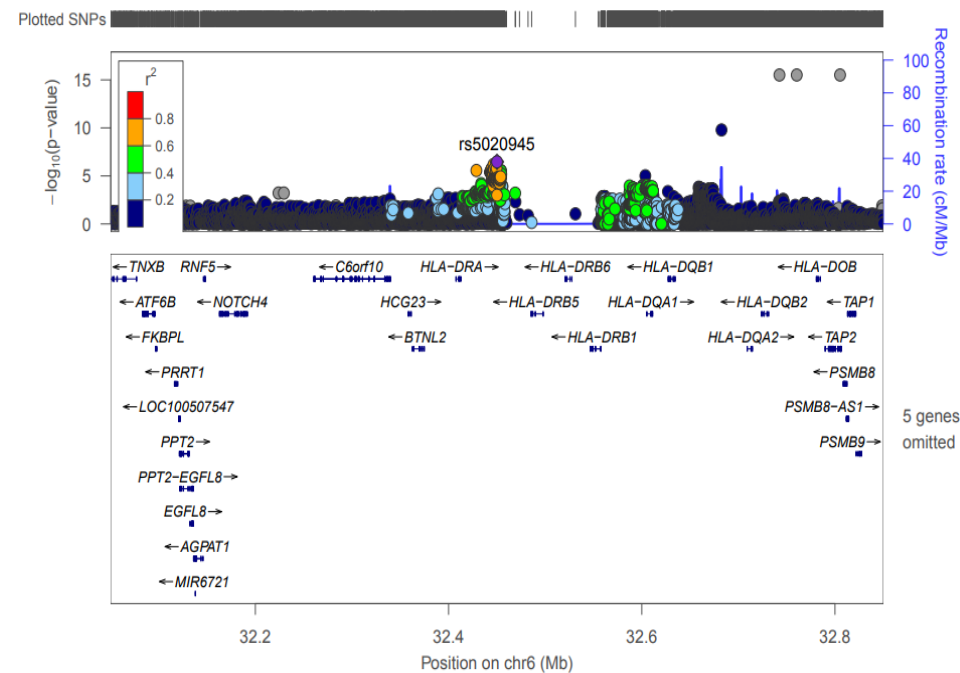

Supplementary Fig. 2(B)

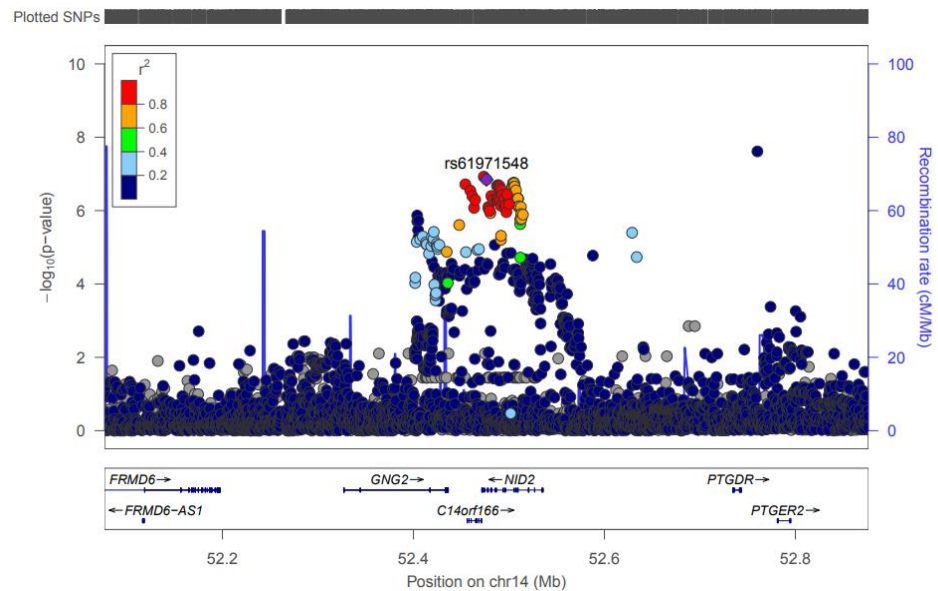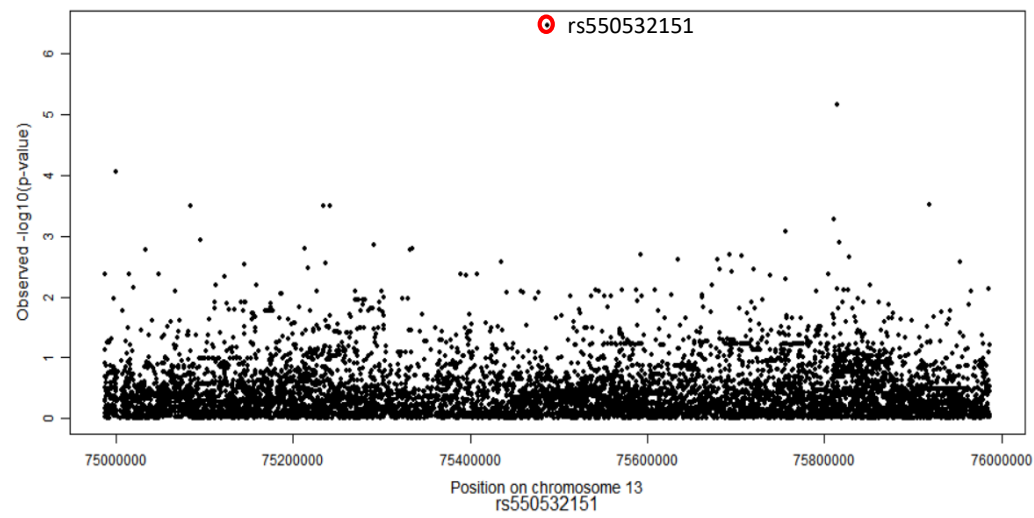

Supplementary Fig. 2(B)

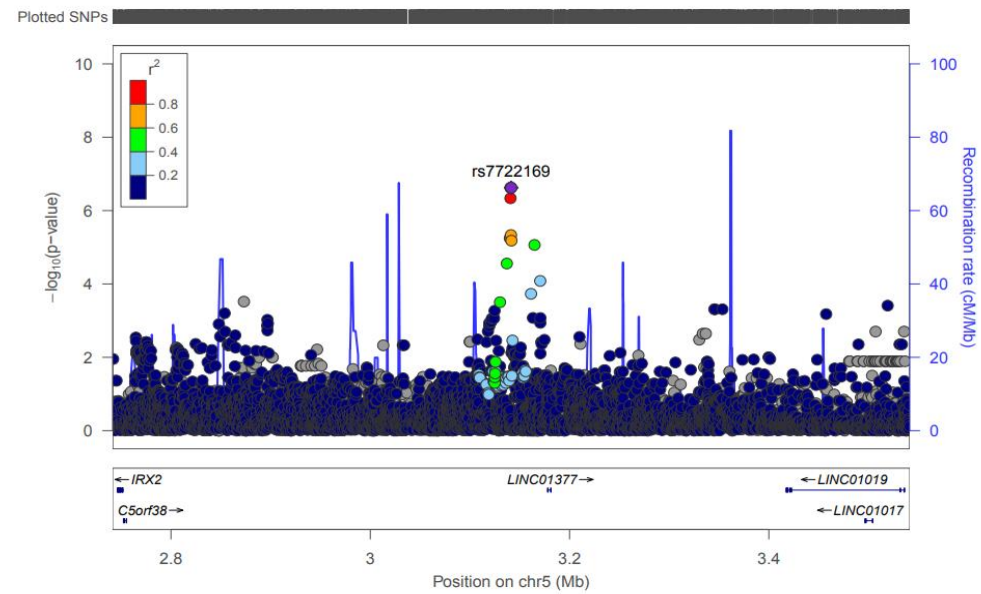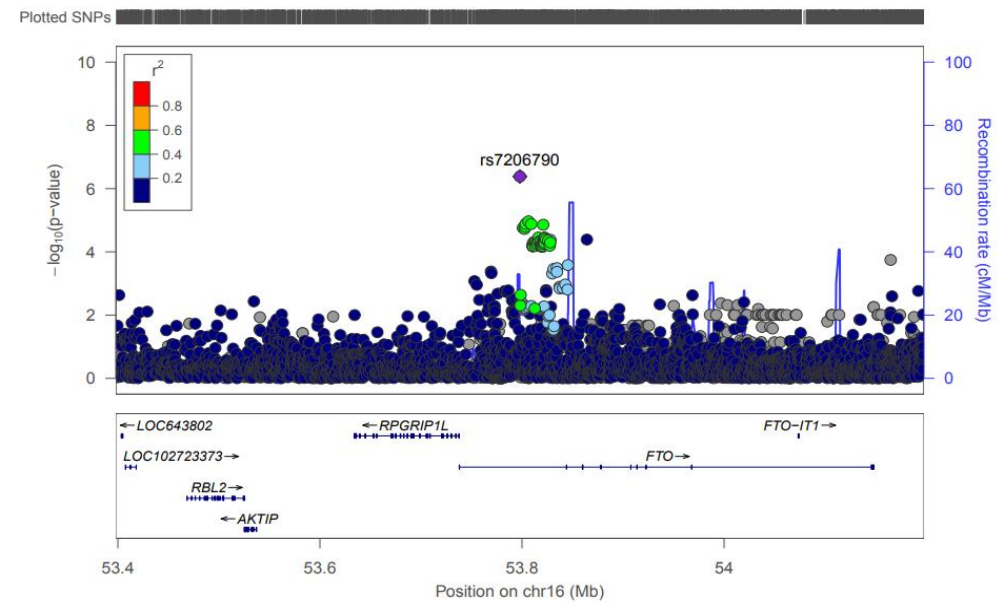

Supplementary Fig. 2(C)
